# Supplementary material
Source: publisher site journal article supplement (https://www.dovepress.com/article/287926)
Supplement: Supplementary file 1 [file get_supplementary_file.php]

**Supplement**

**Musings of a medical student (TKS) (pros vs cons; patient-based AI vs healthcare-based AI)**

As a medical student, I (TKS) have closely followed the many developments in AI, not only in the medical field but also in others. While we have outlined the many benefits of AI and how OSCEs can be altered (with & for AI), nothing is without limitations, and while I anticipate the benefits that AI can bring to medical education & medicine in general, I remain guarded in my enthusiasm due to some drawbacks that I foresee.

For instance, as briefly discussed above, the concept of minimum proficiency in the age of AI. This concept begets the larger issue we were concerned about, which concerns the graded capabilities of AI as well as its relations to cost. Without going into too much depth, we essentially considered the possibility of how better AI capabilities are tied to higher costs, and hence are only available to wealthier countries & states, whilst the less well-to-do areas would have to work with less ideal resources. Unless picked up as government-funded initiatives, this might contribute to the worsening economic disparity & inequality & might even affect the standard of care due to inequity.

Moreover, the increasing prowess of AI might work against what is required in this day & age; that of clinician quality & ability. With the abilities of AI improving exponentially, there might be an over-reliance on these systems, such that there is an erosion of quality of care in our efforts to aid our day to day clinical life. These might also generate a sort of complacency in students & in education systems, for there might be an impression that as these machines learn more & more, we get to benefit by learning less & less, when the truth could not be further from that.

In addition to that, while AI might serve to reduce costs & increase the efficiency of running examinations; & yet, it also takes away something important – the opportunity for human connection, & for reinforcement & refinement of the human touch. Many already lament the decreasing emphasis of communication, compassion & empathy in medical schools, and such a development, while a definite boon for administrators, might further drive students to practice within the confines of AI rather than speaking to & examining patients for clinical experience.

On the point of costs & efficiency, while AI might provide cost savings in the long run, a large investment must be made by administrators & governments into an ever-evolving technology which, in its ability to grow exponentially rapidly, presents a unique scenario where administrators may hesitate to make the investment immediately or wait till a more robust iteration. Given its possible large role in the future, costs are likely to be high in the initial phase, and the skepticism from some might hinder its application early into the system. Such a high “barrier to entry” might prove to be an issue with the implementation of AI into healthcare & education.

While these points are already important issues to resolve before there can be effective implementation into education, there exists other major issues that threaten to hinder the implementation of AI into healthcare proper.

One of the most major issues with AI implementation would be the ethical consequences; in the event of medical errors, which party is at fault? In other words, who is to blame for the morbidity & mortality of patients in the era of AI-guided medicine? This is a major ethico-legal question that needs to be answered before any further implementation of AI can be done into major healthcare algorithms & protocols. This, too, is dependent on the level of AI expertise available at that location, creating a new depth of complexity that we foresee might prompt the delineation of a new subspecialty under medical law & ethics – that which specializes in AI-guided medical error defense & prosecution.

Another major issue would be that of employment & the loss of jobs in the era of AI. Many studies have already showed that AI has helped humans in diagnosis of several conditions in the field of Radiology (& Pathology), and in recent years, several tests have also shown that AI might outperform even world experts. Such statistics have led to concerns about the employability of doctors as well as the demand for healthcare workers, & the resultant resistance to the implementation of such technologies for the fear of hastening their own unemployment & redundancy. While one cannot deny the prowess of AI, studies have also shown that the best results are from those where humans use AI to assess various clinical cases, and this cohort outperformed those which featured either doctors or AI alone. While I concede that this might suggest a drop in the number of doctors employed, such heartening data suggests, at least to me, that there will always be a role for human doctors, & that we will not be replaced by AI, despite the increasing prowess of AI. Also, while the number employed in these specific fields might decrease, the idealist in me believes that, as I have outlined above, new fields will be found as time goes on, & Medicine as a profession will adapt & evolve with the times as our predecessors did with the implementation of what must have been jarring change when blood tests, genetic tests & scans were implemented routinely into clinical practice.

All in all, from the perspective of a medical student, I remain guarded in the methods of implementation of AI & its success into various examinations & to healthcare in general, given the above limitations. That being said, I remain steadfast in the view that AI will revolutionize healthcare & many other industries. The question now, is not that of ***“if”*** it will happen, but rather, ***when*** will such implementations start to take effect, as well as ***how*** & ***what*** will change in our current clinical practice. While some possibilities have been outlined above, we do not claim to be prophets; we have simply consolidated the viewpoints of several distinguished authors & synthesized a possible direction & future that AI might lead medical examinations & OSCEs towards and shape future doctors. As before, I look upon the future with hope that AI can provide a more holistic & complete examination format for training, and that some of the limitations above can be mitigated with advances in technology.
